# Supplementary material for: Solvent-free heterogeneous catalysis for cyanosilylation in a dynamic cobalt-MOF
Source: Royal Society of Chemistry journal article supplement (doi:10.1039/c5dt01456e), 2015-01-01
Supplement: c5dt01456e1.pdf [file c5dt01456e1.pdf]

Electronic Supporting Information (ESI) for *Dalton Transactions*

## Solvent-Free Heterogeneous Catalysis for Cyanosilylation in a Dynamic Cobalt-MOF

Xin Cui, Mei-chen Xu, Ling-juan Zhang, Ru-xin Yao,\* Xian-ming Zhang\*

*School of Chemistry & Material Science, Shanxi Normal University, Linfen 041004, P.*

*R. China*

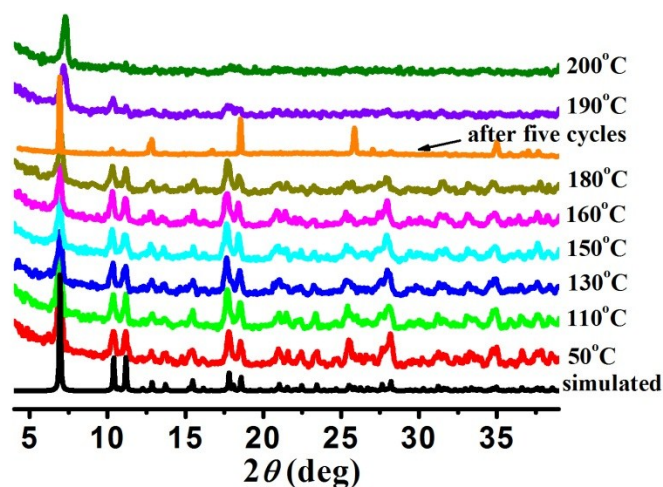

**Figure S1.** The *in situ* temperature-dependent PXRD patterns plots of **1** and that of after five catalytic cycles for catalyst **2**.

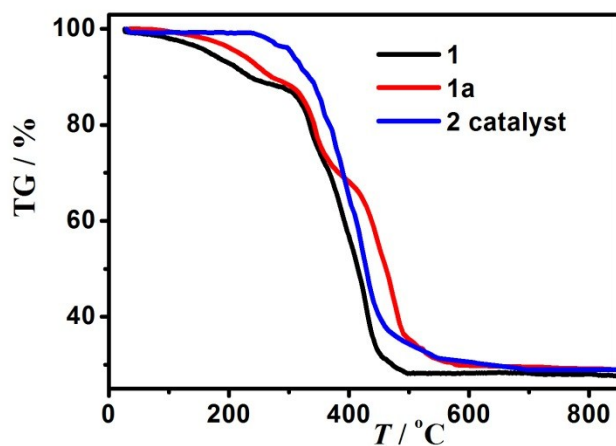

**Figure S2.** TGA plots of **1**, **1a** and catalyst **2**.

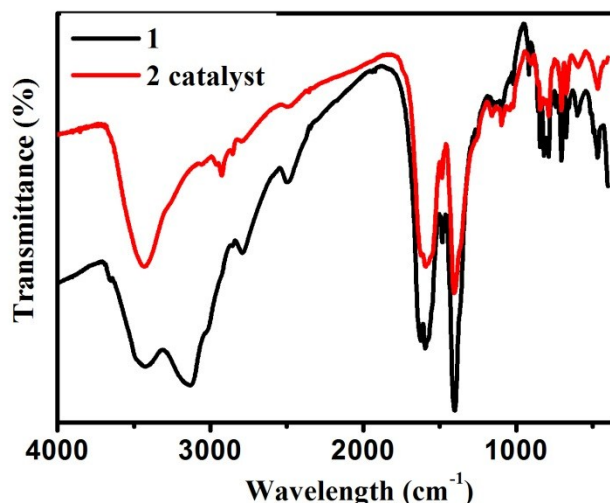

**Figure S3.** IR spectra plots of the pristine complex **1** and catalyst **2**.

**Table S1.** Bond lengths [ $\text{\AA}$ ] and bond angles [deg] for **1**, **1a** and **2**.

| Compound          | <b>1</b>   | <b>1a</b>  | <b>2</b>   |
|-------------------|------------|------------|------------|
| Co(1)-O(9)        | 2.0386(14) | 2.0222(13) | 2.023(4)   |
| Co(1)-O(8b)       | 2.0503(15) | 2.0171(15) | 2.003(4)   |
| Co(1)-O(5a)       | 2.0952(15) | 2.0982(13) | 2.056(4)   |
| Co(1)-O(9c)       | 2.1072(14) | 2.0689(12) | 2.058(4)   |
| Co(1)-O(1)        | 2.1075(15) | 2.0643(13) | 2.039(4)   |
| Co(1)-O(1W)       | 2.2670(19) |            |            |
| Co(2)-O(9)        | 2.0243(14) | 2.0466(12) | 2.046(4)   |
| Co(2)-O(2)        | 2.0753(15) | 2.0761(14) | 2.047(4)   |
| Co(2)-O(3d)       | 2.0795(16) | 2.0737(16) | 2.050(4)   |
| Co(2)-O(7e)       | 2.1071(15) | 2.0985(14) | 2.081(4)   |
| Co(2)-O(6a)       | 2.1435(15) | 2.1529(12) | 2.129(4)   |
| Co(2)-O(2W)       | 2.1837(17) | 2.1617(16) | 2.210(6)   |
| O(9)-Co(1)-O(8c)  | 176.63(6)  | 168.89(5)  | 165.1(2)   |
| O(9)-Co(1)-O(5a)  | 92.03(6)   | 90.27(5)   | 90.10(17)  |
| O(8c)-Co(1)-O(5a) | 90.51(6)   | 87.98(6)   | 87.70(18)  |
| O(9)-Co(1)-O(9b)  | 81.77(6)   | 81.69(6)   | 81.08(18)  |
| O(8c)-Co(1)-O(9b) | 95.83(6)   | 99.50(5)   | 100.17(18) |
| O(5a)-Co(1)-O(9b) | 172.86(6)  | 171.66(5)  | 170.80(16) |

|                   |           |           |            |
|-------------------|-----------|-----------|------------|
| O(9)-Co(1)-O(1)   | 97.79(6)  | 103.53(5) | 105.11(18) |
| O(8c)-Co(1)-O(1)  | 84.46(6)  | 87.48(6)  | 89.7(2)    |
| O(5a)-Co(1)-O(1)  | 89.08(6)  | 91.25(5)  | 91.94(18)  |
| O(9b)-Co(1)-O(1)  | 88.26(6)  | 92.75(5)  | 92.85(18)  |
| O(1w)-Co(1)-O(9b) | 102.39(6) |           |            |
| O(1w)-Co(1)-O(8c) | 87.67(7)  |           |            |
| O(1w)-Co(1)-O(9)  | 90.54(7)  |           |            |
| O(1w)-Co(1)-O(5a) | 81.10(6)  |           |            |
| O(1w)-Co(1)-O(1)  | 167.36(7) |           |            |
| O(9)-Co(2)-O(2)   | 95.10(6)  | 96.56(6)  | 99.69(19)  |
| O(9)-Co(2)-O(3d)  | 98.37(6)  | 95.43(5)  | 96.71(18)  |
| O(2)-Co(2)-O(3d)  | 166.28(7) | 167.18(6) | 162.95(19) |
| O(9)-Co(2)-O(7e)  | 88.01(6)  | 89.45(5)  | 90.39(17)  |
| O(2)-Co(2)-O(7e)  | 91.03(7)  | 89.04(18) | 87.11(19)  |
| O(3d)-Co(2)-O(7e) | 86.86(7)  | 87.77(6)  | 88.15(19)  |
| O(9)-Co(2)-O(6a)  | 100.89(6) | 98.73(5)  | 99.80(16)  |
| O(2)-Co(2)-O(6a)  | 82.43(6)  | 84.00(5)  | 84.41(17)  |
| O(3d)-Co(2)-O(6a) | 97.51(6)  | 98.66(5)  | 97.40(17)  |
| O(7e)-Co(2)-O(6a) | 169.35(6) | 168.99(5) | 167.70(17) |
| O(2w)-Co(2)-O(2)  | 82.31(7)  | 82.76(6)  | 80.3(2)    |
| O(2w)-Co(2)-O(3d) | 83.97(7)  | 84.81(6)  | 82.9(2)    |
| O(2w)-Co(2)-O(6a) | 88.30(6)  | 87.61(5)  | 85.9(2)    |
| O(2w)-Co(2)-O(7e) | 82.48(6)  | 84.10(6)  | 83.9(2)    |
| O(2w)-Co(2)-O(9)  | 170.08(7) | 173.53(5) | 174.3(2)   |
| Co(2)-O(9)-Co(1)  | 112.60(6) | 109.62(5) | 107.2(2)   |
| Co(2)-O(9)-Co(1b) | 116.94(7) | 115.66(6) | 114.8(2)   |
| Co(1)-O(9)-Co(1b) | 98.23(6)  | 98.31(6)  | 98.92(17)  |

Symmetry codes: (a)  $-x, -1/2+y, 1/2-z$ ; (b)  $1-x, 2-y, 1-z$ ; (c)  $-x, 2-y, 1-z$ ; (d)  $1-x, -1/2+y, 1/2-z$ ; (e)  $1+x, y, z$ .

**Table S2.** Optimization of conditions for catalyst **2** and contrast test of **1** and **1a**.

| Entry    | Cat.(mol %)             | TMSCN      | Temp.(°C)   | Conv.(%) <sup>a</sup> |
|----------|-------------------------|------------|-------------|-----------------------|
| 1        | 0                       | 2eq        | 40          | 36.6                  |
| 2        | 1                       | 2eq        | 40          | 65.2                  |
| 3        | 1                       | 2eq        | r.t.        | 76.6                  |
| 4        | 0.5                     | 2eq        | r.t.        | 96.5                  |
| <b>5</b> | <b>0.1</b>              | <b>2eq</b> | <b>r.t.</b> | <b>98.5</b>           |
| 6        | 0.1(hydrated <b>1</b> ) | 2eq        | r.t.        | 38.2                  |
| 7        | 0.1 ( <b>1a</b> )       | 2eq        | r.t.        | 40.3                  |

<sup>a</sup> Determined by GC based on the carbonyl substrate.

**Table S3.** Bond lengths [Å] and angles [deg] of cobalt cluster for **1**, **1a** and **2**.

| bond / angle      | <b>1</b>  | <b>1a</b>  | <b>2</b>  |
|-------------------|-----------|------------|-----------|
| Co(1)-Co(1b)      | 3.1350(1) | 3.1279(1)  | 3.1005(3) |
| Co(1)-Co(2)       | 3.3803(1) | 3.3296(2)  | 3.2751(2) |
| Co(1)-Co(2a)      | 3.5218(1) | 3.5051(2)  | 3.4578(3) |
| Co(1)-O(9)-Co(1b) | 98.46(6)  | 98.79(17)  | 99.14(19) |
| Co(2)-O(9)-Co(1)  | 112.92(6) | 109.93(19) | 107.1(2)  |
| Co(2)-O(9)-Co(1b) | 117.27(7) | 116.8(2)   | 115.1(2)  |
